# Supplementary material for: Risk of Alzheimer’s Disease Following Influenza Vaccination: A Claims-Based Cohort Study Using Propensity Score Matching
Source: PubMed Central journal article supplement — J Alzheimers Dis. 2022 Aug 2;88(3):1061–74. doi: 10.3233/JAD-220361 (PMC9484126; doi:10.3233/jad-220361), 2022-08-02
Supplement: jad-88-jad220361-s001.pdf [file jad-88-jad220361-s001.pdf]

# Supplementary Material

## Risk of Alzheimer’s Disease Following Influenza Vaccination: A Claims-Based Cohort Study Using Propensity Score Matching

**Supplementary Table 1.** Definitions of Variables, Study Dates, and Study Periods

| Variable, Date, or Period                                                                                                                                                                                                                                                                                             | Definition                                                                                                                                                                                                                                                                                                                                                                                                                                                                                                                        |
|-----------------------------------------------------------------------------------------------------------------------------------------------------------------------------------------------------------------------------------------------------------------------------------------------------------------------|-----------------------------------------------------------------------------------------------------------------------------------------------------------------------------------------------------------------------------------------------------------------------------------------------------------------------------------------------------------------------------------------------------------------------------------------------------------------------------------------------------------------------------------|
| <b>General</b>                                                                                                                                                                                                                                                                                                        |                                                                                                                                                                                                                                                                                                                                                                                                                                                                                                                                   |
| Look-back period                                                                                                                                                                                                                                                                                                      | September 1, 2009, through August 31, 2015                                                                                                                                                                                                                                                                                                                                                                                                                                                                                        |
| Follow-up period                                                                                                                                                                                                                                                                                                      | September 1, 2015, through August 31, 2019                                                                                                                                                                                                                                                                                                                                                                                                                                                                                        |
| Follow-up duration for each patient                                                                                                                                                                                                                                                                                   | Number of months from the start of follow-up (i.e., September 1, 2015) to the date of the first AD-related record (see “Incident AD Codes” below), death, or censoring (i.e., patient’s last record in the Optum Clinformatics Data Mart)                                                                                                                                                                                                                                                                                         |
| <b>Outcome and Exclusions</b>                                                                                                                                                                                                                                                                                         |                                                                                                                                                                                                                                                                                                                                                                                                                                                                                                                                   |
| <b>Alzheimer Disease (AD) Medications</b><br>Used during the look-back period for exclusion of patients with preexisting cognitive impairment (see “Diagnosis Exclusion Codes” below).<br>Used during the follow-up period for identification of patients with incident AD (see “Incident AD Diagnosis Codes” below). | Donepezil, galantamine, rivastigmine, memantine                                                                                                                                                                                                                                                                                                                                                                                                                                                                                   |
| <b>Diagnosis Codes for Exclusion Criteria</b><br>Used with AD-related medications to exclude patients with dementia (of any cause), mild cognitive impairment, or encephalopathy during the look-back period.                                                                                                         | <i>ICD-9</i> codes: 046.1x, 046.3, 290.x, 291.1, 291.2, 294.x, 294.1x, 294.2x, 331.x, 332.x, 333.0, 333.4, 438.0, 780.93, 797<br><i>ICD-10</i> codes: A81.0x, A81.2, F01.x, F02.x, F03.x, F04, F05, F10.26, F10.27, F10.96, F10.97, G10, G20, G21.1x, G21.2, G21.3, G21.4, G21.8, G21.9, G23.x, G30.x, G31.0x, G31.1, G31.2, G31.83, G31.84, G31.85, G31.89, G31.9, G91.x, G93.7, G94, I69.91, R41.2, R41.3, R41.81<br><br>- Required $\geq 1$ occurrence ( <i>ICD</i> code or AD-related medication) during the look-back period |
| <b>Diagnosis Codes for Incident AD Case-Detection Algorithm</b><br>Used with AD medication records to identify patients with incident AD during the follow-up period.<br><b>Includes diagnostic codes for AD, dementia of unspecified cause, and “senile” dementia.</b>                                               | <i>ICD-9</i> codes: 290.0, 290.1x, 290.2x, 290.3, 294.2x, 331.0, 331.2, 331.9<br><i>ICD-10</i> codes: F03.9x, G30.x, G31.1, G31.9<br><br>- Required $\geq 2$ occurrences ( <i>ICD</i> code[s] and/or AD medication record[s]) on different days within the same 12-month period during the follow-up period<br>- The date of AD onset was defined as the date of the first AD-related record in the first 12-month period that criteria were met                                                                                  |

| Outcome Diagnosis Codes for Sensitivity Analyses                                                         |                                                                                                                                                                                                                                                                                                                                                                                                                                                                                                                                                                                                                                                                                                                                                                                                                                                                                                                                                                                                                                                                                                                                                      |
|----------------------------------------------------------------------------------------------------------|------------------------------------------------------------------------------------------------------------------------------------------------------------------------------------------------------------------------------------------------------------------------------------------------------------------------------------------------------------------------------------------------------------------------------------------------------------------------------------------------------------------------------------------------------------------------------------------------------------------------------------------------------------------------------------------------------------------------------------------------------------------------------------------------------------------------------------------------------------------------------------------------------------------------------------------------------------------------------------------------------------------------------------------------------------------------------------------------------------------------------------------------------|
| <b>Incident AD <i>without</i> Unspecified or “Senile” Dementias</b>                                      | <p><u>ICD-9 codes</u><sup>a</sup>: 331.0<br/><u>ICD-10 codes</u><sup>a</sup>: G30.x</p> <p>- Required <math>\geq 2</math> occurrences (<i>ICD</i> code[s] and/or AD medication record[s]) on different days within the same 12-month period during the follow-up period<br/>- The date of AD onset was defined as the date of the first AD-related record in the first 12-month period that criteria were met</p> <p><sup>a</sup> Schliep KC, Ju S, Foster NL, Smith KR, Varner MW, Ostbye T, Tschanz JT (2021) How good are medical and death records for identifying dementia? <i>Alzheimers Dement</i>, doi: 10.1002/alz.12526.</p>                                                                                                                                                                                                                                                                                                                                                                                                                                                                                                               |
| <b>Incident Alzheimer Disease and Related Dementias (ADRD)</b>                                           | <p><u>ICD-9 codes</u><sup>a</sup>: 290.0, 290.10, 290.11, 290.12, 290.13, 290.20, 290.21, 290.3, 290.40, 290.41, 290.42, 290.43, 294.0, 294.10, 294.11, 294.20, 294.21, 294.8, 331.0, 331.11, 331.19, 331.2, 331.7, 797<br/><u>ICD-10 codes</u><sup>b</sup>: F01.50, F01.51, F02.80, F02.81, F03.90, F03.91, G30.0, G30.1, G30.8, G30.9, G31.01, G31.09, G31.1, R41.81</p> <p>- Required <math>\geq 2</math> occurrences (<i>ICD</i> code[s] and/or AD medication record[s]) on different days within the same 12-month period during the follow-up period<br/>- The date of AD onset was defined as the date of the first AD-related record in the first 12-month period that criteria were met</p> <p><sup>a</sup> Lee E, Gatz M, Tseng C, Schneider LS, Pawluczyk S, Wu AH, Deapen D (2019) Evaluation of Medicare Claims Data as a Tool to Identify Dementia. <i>J Alzheimers Dis</i> <b>67</b>, 769-778.<br/><sup>b</sup> Moura L, Festa N, Price M, Volya M, Benson NM, Zafar S, Weiss M, Blacker D, Normand SL, Newhouse JP, Hsu J (2021) Identifying Medicare Beneficiaries with Dementia. <i>J Am Geriatr Soc</i> <b>69</b>, 2240-2251.</p> |
| Influenza Vaccination                                                                                    |                                                                                                                                                                                                                                                                                                                                                                                                                                                                                                                                                                                                                                                                                                                                                                                                                                                                                                                                                                                                                                                                                                                                                      |
| Influenza vaccination<br>( <i>intramuscular</i> )                                                        | <p><u>Drug names</u>: Afluria, Agriflu, Fluad, Fluarix, Flublok, Flucelvax, Flulaval, Fluzone, Flushield, Fluvirin, Fluogen, Flu-Imune<br/><u>CPT codes</u>: 90630, 90653-90659, 90661, 90662, 90663, 90664, 90673, 90674, 90682, 90685-90689, 90694, 90724, 90756<br/><u>Healthcare Common Procedure Coding System (HCPCS) codes</u>: Q2034, Q2035, Q2036, Q2037, Q2038, Q2039, G0008</p>                                                                                                                                                                                                                                                                                                                                                                                                                                                                                                                                                                                                                                                                                                                                                           |
| Covariates – measured during the look-back period (except for age, which was measured at the index date) |                                                                                                                                                                                                                                                                                                                                                                                                                                                                                                                                                                                                                                                                                                                                                                                                                                                                                                                                                                                                                                                                                                                                                      |
| Age                                                                                                      | Age in years at the index date (i.e., first day of the follow-up period)                                                                                                                                                                                                                                                                                                                                                                                                                                                                                                                                                                                                                                                                                                                                                                                                                                                                                                                                                                                                                                                                             |
| Sex                                                                                                      | Female, male, unknown                                                                                                                                                                                                                                                                                                                                                                                                                                                                                                                                                                                                                                                                                                                                                                                                                                                                                                                                                                                                                                                                                                                                |

|                                              |                                                                                                                                                                                                                                                                                                                                                                                                                                                                                                                |
|----------------------------------------------|----------------------------------------------------------------------------------------------------------------------------------------------------------------------------------------------------------------------------------------------------------------------------------------------------------------------------------------------------------------------------------------------------------------------------------------------------------------------------------------------------------------|
| Race                                         | <p>Asian, Black, Hispanic, White, unknown</p> <ul style="list-style-type: none"> <li>- The Optum CDM includes persons identifying as Pacific Islander within the “Asian” race/ethnicity category.</li> <li>- The Optum CDM does not identify Native Americans as a separate racial/ethnic category.</li> </ul>                                                                                                                                                                                                 |
| Geographic region                            | <p>Based on the region of the primary beneficiary’s residence in the Optum CDM enrollment data. States were grouped into the following regions:</p> <ul style="list-style-type: none"> <li>• Northeast (CT, ME, MA, NH, RI, VT, NJ, NY, PA)</li> <li>• North Central (IL, IN, MI, OH, WI, IA, KS, MN, MO, NE, ND, SD)</li> <li>• South (DC, DE, FL, GA, MD, NC, SC, VA, WV, AL, KY, MS, TN, AR, LA, OK, TX)</li> <li>• West (AZ, CO, ID, MT, NV, NM, UT, WY, AK, CA, HI, OR, WA)</li> <li>• Unknown</li> </ul> |
| Number of healthcare encounters              | <p>The number of outpatient and inpatient healthcare encounters during the look-back period.</p> <ul style="list-style-type: none"> <li>- Each inpatient admission (i.e., hospitalization) was counted as 1 health care encounter, regardless of the length of stay.</li> <li>- To exclude pharmacy records, only outpatient records with <math>\geq 1</math> ICD codes were counted as a healthcare encounter.</li> </ul>                                                                                     |
| Number of routine “well visit” examinations  | <p><u>CPT codes</u>: 99386, 99387, 99396, 99397<br/> <u>HCPCS codes</u>: G0402, G0438, G0439, G0444, S0610, S0612, S0613, G0101, G0091<br/> <u>ICD-9 codes</u>: V70.0, V72.31<br/> <u>ICD-10 codes</u>: Z00.00, Z00.01, Z01.411, Z01.419</p>                                                                                                                                                                                                                                                                   |
| Asthma                                       | <p><u>ICD-9 codes</u>: 493.x;<br/> <u>ICD-10 codes</u>: J45.x</p> <p>- Single occurrence during the look-back period</p>                                                                                                                                                                                                                                                                                                                                                                                       |
| Atrial fibrillation of flutter               | <p><u>ICD-9 codes</u>: 427.3x;<br/> <u>ICD-10 codes</u>: I48.x</p> <p>- Single occurrence during the look-back period</p>                                                                                                                                                                                                                                                                                                                                                                                      |
| Vitamin B12 deficiency                       | <p><u>ICD-9 codes</u>: 266.2, 281.1<br/> <u>ICD-10 codes</u>: E53.8, D51.x</p> <p>- Single occurrence during the look-back period</p>                                                                                                                                                                                                                                                                                                                                                                          |
| Congestive heart failure (CHF)               | <p><u>ICD-9 codes</u>: 398.91, 402.11, 402.91, 404.11, 404.13, 404.91, 404.93, 428.x;<br/> <u>ICD-10 codes</u>: I09.81, I11.0, I13.0, I13.2, I50.x</p> <p>- Single occurrence during the look-back period</p>                                                                                                                                                                                                                                                                                                  |
| Chronic obstructive pulmonary disease (COPD) | <p><u>ICD-9 codes</u>: 491.x, 492.x, 496;<br/> <u>ICD-10 codes</u>: J41.x, J42, J43.2, J43.8, J43.9, J44.x</p> <p>- Single occurrence during the look-back period</p>                                                                                                                                                                                                                                                                                                                                          |

|                                                                                          |                                                                                                                                                                                                                                                                                                                                                                                                                                                                                        |
|------------------------------------------------------------------------------------------|----------------------------------------------------------------------------------------------------------------------------------------------------------------------------------------------------------------------------------------------------------------------------------------------------------------------------------------------------------------------------------------------------------------------------------------------------------------------------------------|
| Hyperlipidemia                                                                           | <p><u>ICD-9 codes:</u> 272.0, 272.1, 272.2, 272.4;<br/> <u>ICD-10 codes:</u> E78.0-E78.2, E78.4-E78.5</p> <p>- Single occurrence during the look-back period</p>                                                                                                                                                                                                                                                                                                                       |
| Hypertension                                                                             | <p><u>ICD-9 codes:</u> 401.x<br/> <u>ICD-10 codes:</u> I10</p> <p>- Single occurrence during the look-back period</p>                                                                                                                                                                                                                                                                                                                                                                  |
| Ischemic heart disease (IHD)                                                             | <p><u>ICD-9 codes:</u> 410.x, 411.x, 412.x, 413.x, 414.x, V45.81, V45.82;<br/> <u>ICD-10 codes:</u> I20.x, 121.x, 122.x, 123.x, 124.x, I25.x</p> <p>- Single occurrence during the look-back period</p>                                                                                                                                                                                                                                                                                |
| Obesity                                                                                  | <p><u>ICD-9 codes:</u> 278.00, 278.01, 278.03, V85.3x, V85.4x;<br/> <u>ICD-10 codes:</u> E66.01, E66.09, E66.1, E66.2, E66.8, E66.9, Z68.3x, Z68.4x<br/> <u>BMI:</u> Last BMI during the look-back period is <math>\geq 30</math> kg/m<sup>2</sup></p> <p>- Single ICD occurrence or last recorded BMI <math>\geq 30</math> kg/m<sup>2</sup> during the look-back period</p>                                                                                                           |
| Traumatic brain injury (TBI)                                                             | <p><u>ICD-9 codes:</u> 800.x-804.x, 850.x-854.x, 905.0, 907.0, 959.01, V15.52;<br/> <u>ICD-10 codes:</u> S01.90x, S02.x, S04.x, S06.x, S07.x, S09.8x, S09.9x, Z87.820</p> <p>- Single occurrence during the look-back period</p>                                                                                                                                                                                                                                                       |
| Type II diabetes                                                                         | <p><u>ICD-9 codes:</u> 250.x0, 250.x2, 357.2, 362.0x, 366.41;<br/> <u>ICD-10 codes:</u> E11.x, E08.42, E09.42, E13.42, E08.36, E09.36, E13.36</p> <p>- 2 outpatient occurrences on different days within the same 24-month period or 1 inpatient occurrence during the look-back period</p>                                                                                                                                                                                            |
| Stroke                                                                                   | <p><u>ICD-9 codes:</u> 430, 431, 433.x1, 434.x1, 438.x;<br/> <u>ICD-10 codes:</u> I61.x, I63.3x, I63.4x, I63.5x, I63.6, I63.8, I63.9, I66.x, I69.1x, I69.2x, I69.3x, I69.8x, I69.9x</p> <p>- Single occurrence during the look-back period</p>                                                                                                                                                                                                                                         |
| Alcohol-related disorder ( <i>includes alcohol dependence and alcohol use disorder</i> ) | <p><u>ICD-9 codes:</u> 303.9x, 305.0x;<br/> <u>ICD-10 codes:</u> F10.x</p> <p>- Single occurrence during the look-back period</p>                                                                                                                                                                                                                                                                                                                                                      |
| Anxiety disorder                                                                         | <p><u>ICD-9 codes:</u> 309.81, 300.00, 300.01, 300.02, 300.23, 300.3;<br/> <u>ICD-10 codes:</u> F40.1x, F41.0, F41.1, F41.9, F42, F43.1x</p> <p>- Composite of post-traumatic stress disorder, panic disorder, obsessive compulsive disorder, social phobia, generalized anxiety disorder, and anxiety disorder not otherwise specified.</p> <p>- 2 outpatient occurrences on different days within the same 12-month period or 1 inpatient occurrence during the look-back period</p> |

|                                                                             |                                                                                                                                                                                                                                                                                                                                                                                                                                                                                                                                                                                                                                                                                                                                                                                                                                                                                                                                                    |
|-----------------------------------------------------------------------------|----------------------------------------------------------------------------------------------------------------------------------------------------------------------------------------------------------------------------------------------------------------------------------------------------------------------------------------------------------------------------------------------------------------------------------------------------------------------------------------------------------------------------------------------------------------------------------------------------------------------------------------------------------------------------------------------------------------------------------------------------------------------------------------------------------------------------------------------------------------------------------------------------------------------------------------------------|
| Depression                                                                  | <p><u>ICD-9 codes:</u> 296.2x, 296.3x, 311;<br/> <u>ICD-10 codes:</u> F32.0-F32.5, F32.9, F33.0-F33.3, F33.4x, F33.9</p> <p>- 2 outpatient occurrences on different days within the same 12-month period or 1 inpatient occurrence during the look-back period</p>                                                                                                                                                                                                                                                                                                                                                                                                                                                                                                                                                                                                                                                                                 |
| Substance use disorder<br>(excludes alcohol- and tobacco-related disorders) | <p><u>ICD-9 codes:</u> 304.0x, 304.1x, 304.2x, 304.3x, 304.4x, 304.5x, 304.6x, 304.7x, 304.8x, 304.9x, 305.2x, 305.3x, 305.4x, 305.5x, 305.6x, 305.7x, 305.9x<br/> <u>ICD-10 codes:</u> F11.x, F12.x, F13.x, F14.x, F15.x, F16.x, F18.x, F19.x</p> <p>- Composite of substance use disorders involving any of the following: opioids; cannabis; sedatives, hypnotics, or anxiolytics; cocaine; amphetamines or other stimulants; hallucinogens; inhalants; and/or other psychoactive substances, including polysubstance use.</p> <p>- Single occurrence during the look-back period</p>                                                                                                                                                                                                                                                                                                                                                           |
| Tobacco use<br>(includes current or former use)                             | <p><u>ICD-9 codes:</u> V15.82, 305.1;<br/> <u>ICD-10 codes:</u> Z87.891, Z72.0, F17.20x, F17.21x<br/> <u>CPT codes:</u> 99406, 99407<br/> <u>HCPCS codes:</u> G0436, G0437</p> <p>- Single occurrence during the look-back period</p>                                                                                                                                                                                                                                                                                                                                                                                                                                                                                                                                                                                                                                                                                                              |
| Medications<br>(multiple variables)                                         | <p>A variable was created for each of the following medication classes, based on the American Hospital Formulary Service (AHFS) Pharmacologic-Therapeutic Classification system.</p> <ul style="list-style-type: none"> <li>● <b>Anticholinergics</b> - AHFS codes: 12:08, 28:36.08, 04:04</li> <li>● <b>Antihypertensives</b> - AHFS codes: 24:08</li> <li>● <b>Antivirals</b> - AHFS codes: 08:18</li> <li>● <b>Glucocorticoids</b> - AHFS codes: 68:04</li> <li>● <b>Metformin</b> - AHFS codes: 68:20.04</li> <li>● <b>NSAIDs</b> - AHFS codes: 28:08.04</li> <li>● <b>Statins</b> - AHFS codes: 24:06.08</li> <li>● <b>Sulfonylureas</b> - AHFS codes: 68:20.20</li> </ul> <p>- The variable for a given class was coded “yes” only if records indicated sustained use of a medication(s) in that class. “Sustained use” was defined as <math>\geq 2</math> pharmacy claim records within any 6-month period during the look-back period.</p> |

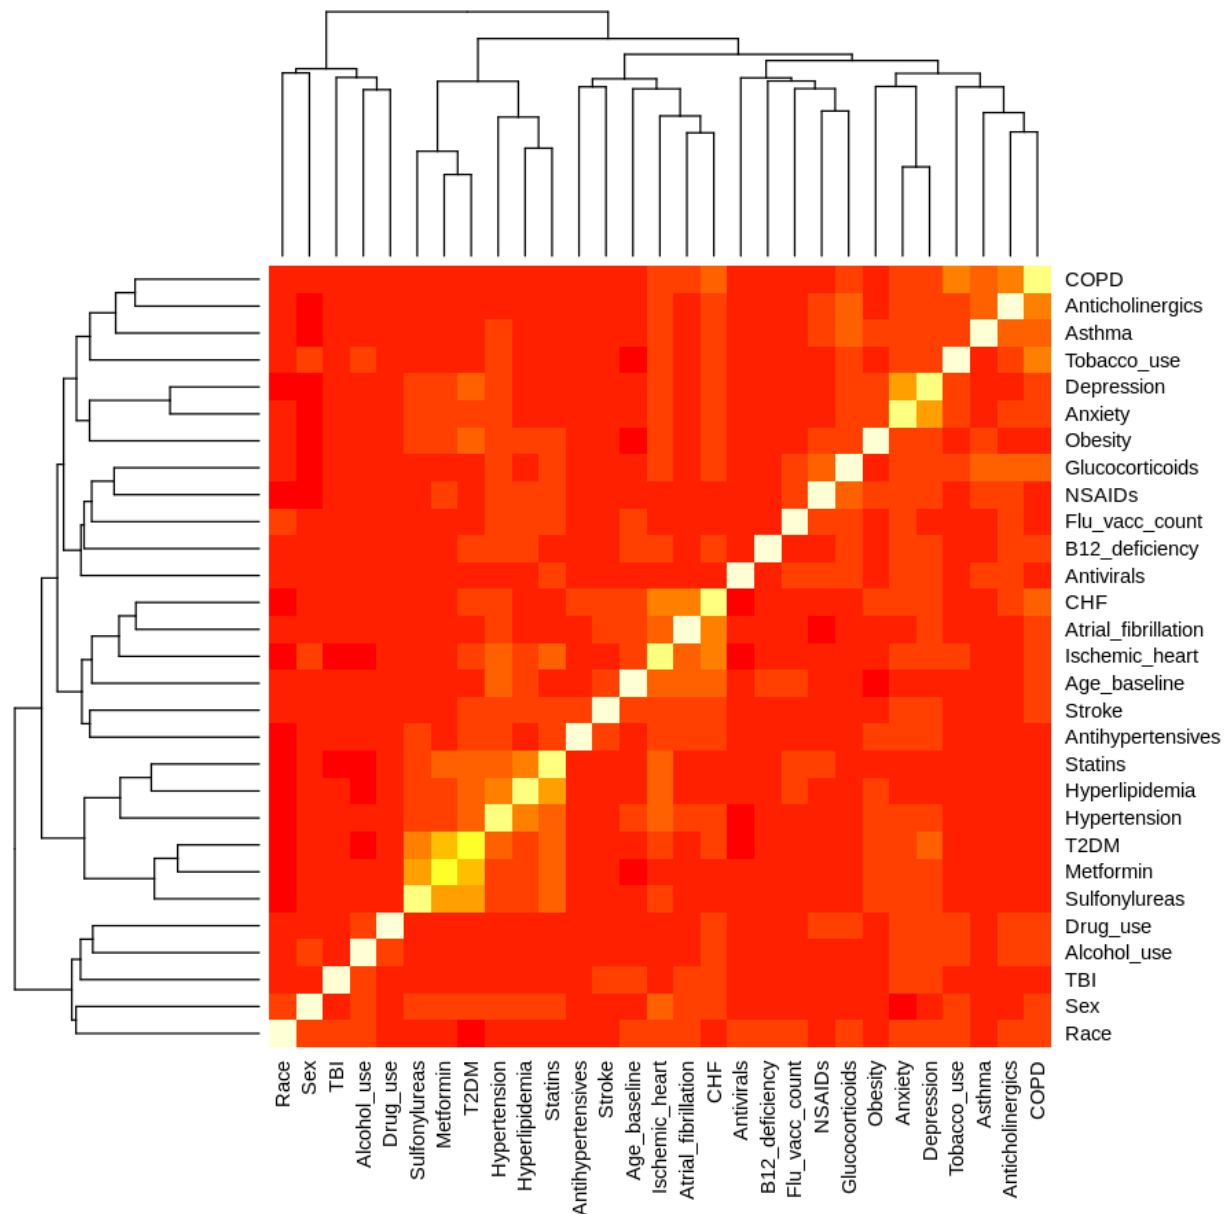

**Supplementary Figure 1. Pairwise Correlation of Independent Variables in the Unmatched Sample.** A heatmap of the pairwise correlations between predictors (i.e., influenza vaccination and covariates) in the unmatched sample, constructed to assess collinearity prior to creating the time-to-event model. Whiter colors indicate greater correlation; redder colors indicate weaker correlation. CHF, congestive heart failure; COPD, chronic obstructive pulmonary disease; NSAIDs, nonsteroidal anti-inflammatory drugs; T2DM, type II diabetes mellitus; TBI, traumatic brain injury.

**Supplementary Table 2. Effect Size Estimates from the Ad-hoc ATT Analyses**

| <b>Duration of look-back</b> | <b>Minimum age (in years) at the start of follow-up</b> | <b>Number of vaccinated-<br/>unvaccinated PS-<br/>matched pairs</b> | <b>RR<br/>[95% CI]</b> | <b>ARR<br/>[95% CI]</b> | <b>NNT</b> |
|------------------------------|---------------------------------------------------------|---------------------------------------------------------------------|------------------------|-------------------------|------------|
| 6 years                      | ≥ 65                                                    | 935,887                                                             | 0.60<br>[0.59, 0.61]   | 0.034<br>[0.033, 0.035] | 29.4       |
| 6 years                      | ≥ 75                                                    | 366,235                                                             | 0.62<br>[0.61, 0.63]   | 0.060<br>[0.059, 0.062] | 16.7       |
| 2 years                      | ≥ 65                                                    | 348,714                                                             | 0.74<br>[0.73, 0.75]   | 0.027<br>[0.025, 0.028] | 37.0       |
| 2 years                      | ≥ 75                                                    | 204,134                                                             | 0.75<br>[0.74, 0.77]   | 0.036<br>[0.034, 0.038] | 27.8       |

The combination of a 6-year look-back period and a minimum age of 65 at the start of follow-up represents the parameters of the primary analysis (see “Primary Analysis: Estimation of ATT Using Propensity Score Matching” subsection of the Methods). The bottom three rows display the results of the ad-hoc ATT analyses in which the look-back duration was shortened to 2 years and/or the minimum age at the start of follow-up was increased to 75 years. In the designs with a 2-year look-back period, the follow-up period duration was 8 years. ATT, average treatment effect in the treated; ARR, absolute risk reduction; CI, confidence interval; NNT, number needed to treat; PS, propensity score; RR, relative risk.

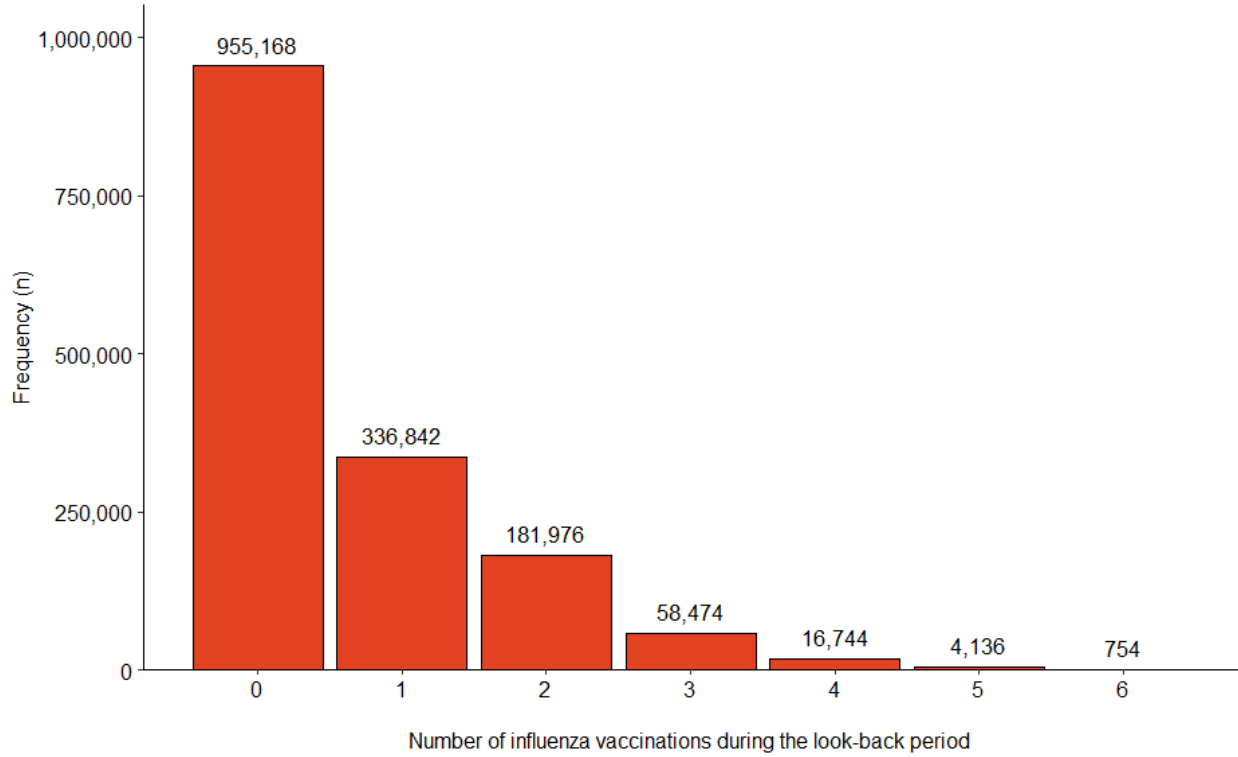

**Supplementary Figure 2. Frequency Distribution of Influenza Vaccinations During the 6-Year Look-back Period in the Unmatched Sample.** A bar chart showing the number of patients in the unmatched sample (i.e., the sample used in the time-to-event analysis) who received each possible number of influenza vaccinations during the 6-year look-back period. See “Secondary Analysis: Time-to-Event Model” subsection of Methods for additional information.



**Supplementary Table 3. Results of the Proportional Subdistribution Hazards Regression Model**

|                                                     |          | <b>Coefficient</b> | <b>sHR</b> | <b>95% CI</b>  |
|-----------------------------------------------------|----------|--------------------|------------|----------------|
| <b>No. of flu vaccinations during look-back</b>     |          | -0.275             | 0.76       | (0.737, 0.784) |
| <i>(No. of flu vaccinations during look-back)*t</i> |          | 0.006              | 1.006      | (1.003, 1.009) |
| <b>Age</b>                                          |          | 0.149              | 1.16       | (1.150, 1.171) |
| <i>Age*t</i>                                        |          | -0.001             | 0.999      | (0.998, 1.001) |
| <b>Sex<sup>a</sup></b>                              | Male     | -0.106             | 0.899      | (0.864, 0.936) |
|                                                     | Black    | 0.371              | 1.449      | (1.398, 1.502) |
| <b>Race<sup>b</sup></b>                             | Hispanic | 0.142              | 1.152      | (1.108, 1.199) |
|                                                     | White    | 0.113              | 1.12       | (1.079, 1.162) |
| <b>Asthma</b>                                       |          | -0.073             | 0.93       | (0.903, 0.957) |
| <b>Atrial fibrillation or flutter</b>               |          | 0.101              | 1.107      | (1.025, 1.194) |
| <i>(Atrial fibrillation or flutter)*t</i>           |          | -0.004             | 0.996      | (0.988, 1.003) |
| <b>B12 deficiency</b>                               |          | 0.125              | 1.133      | (1.089, 1.179) |
| <i>(B12 deficiency)*t</i>                           |          | -0.001             | 0.999      | (0.997, 1.001) |
| <b>Congestive heart failure</b>                     |          | 0.164              | 1.178      | (1.024, 1.356) |
| <i>(Congestive heart failure)*t</i>                 |          | -0.007             | 0.993      | (0.978, 1.009) |
| <b>COPD</b>                                         |          | 0.134              | 1.143      | (1.034, 1.264) |
| <i>COPD*t</i>                                       |          | -0.003             | 0.997      | (0.987, 1.006) |
| <b>Hyperlipidemia and/or statins</b>                |          | -0.285             | 0.752      | (0.706, 0.802) |
| <i>(Hyperlipidemia and/or statins)*t</i>            |          | 0.006              | 1.006      | (1.000, 1.013) |
| <b>Hypertension</b>                                 |          | 0.075              | 1.429      | (1.043, 1.114) |
| <i>Hypertension*t</i>                               |          | -0.001             | 0.009      | (0.998, 1.001) |
| <b>Ischemic heart disease</b>                       |          | 0.101              | 1.106      | (1.062, 1.152) |
| <i>(Ischemic heart disease)*t</i>                   |          | -0.001             | 0.009      | (0.996, 1.001) |
| <b>Obesity</b>                                      |          | -0.254             | 0.776      | (0.745, 0.808) |
| <i>Obesity*t</i>                                    |          | 0.004              | 1.004      | (1.001, 1.007) |

|                                                  |        |       |                 |
|--------------------------------------------------|--------|-------|-----------------|
| <b>Traumatic brain injury</b>                    | 0.297  | 1.346 | (1.236, 1.466)  |
| <i>(Traumatic brain injury)*t</i>                | -0.001 | 0.999 | (0.995, 1.003)  |
| <b>T2DM, metformin, and/or sulfonylureas</b>     | 0.204  | 1.226 | (1.180, 1.274)  |
| <i>(T2DM, metformin, and/or sulfonylureas)*t</i> | -0.002 | 0.998 | (0.995, 1.002)  |
| <b>Stroke</b>                                    | 0.504  | 1.107 | (1.555, 1.761)  |
| <i>Stroke*t</i>                                  | -0.007 | 0.993 | (0.987, 0.999)  |
| <b>Alcohol use disorder</b>                      | 0.357  | 1.655 | (1.294, 1.577)  |
| <i>(Alcohol use disorder)*t</i>                  | -0.003 | 0.996 | (0.991, 1.002)  |
| <b>Depression and/or anxiety disorder</b>        | 0.405  | 1.5   | (1.453, 1.547)  |
| <i>(Depression and/or anxiety disorder)*t</i>    | -0.007 | 0.993 | (0.993, 0.999)  |
| <b>Substance use disorder</b>                    | 0.244  | 1.276 | (1.185, 1.375)  |
| <i>(Substance use disorder)*t</i>                | -0.004 | 0.996 | (0.995, 1.001)  |
| <b>Tobacco use</b>                               | 0.036  | 1.037 | ( 0.987, 1.090) |
| <b>Anticholinergics</b>                          | 0.159  | 1.173 | (1.079, 1.274)  |
| <i>(Anticholinergics)*t</i>                      | -0.004 | 0.996 | (0.987, 1.005)  |
| <b>Antihypertensives</b>                         | 0.097  | 1.102 | (1.041, 1.167)  |
| <i>(Antihypertensives)*t</i>                     | -0.002 | 0.998 | (0.994, 1.003)  |
| <b>Antivirals</b>                                | -0.038 | 0.963 | (0.927, 1.000)  |
| <b>Glucocorticoids</b>                           | -0.107 | 0.898 | (0.872, 0.925)  |
| <i>(Glucocorticoids)*t</i>                       | 0.001  | 1.001 | (1.000, 1.003)  |

Time-to-event results for a look-back period of 6 years and age  $\geq 65$  at the start of follow-up (see “Secondary Analysis: Time-to-Event Model” subsection of Methods for more information). Main effect terms are bolded; covariate-time interaction terms, when present, are italicized. CI, confidence interval; COPD, chronic obstructive pulmonary disease; NSAIDs, nonsteroidal anti-inflammatory drugs; sHR, subdistribution hazard ratio; t, time; T2DM, type II diabetes mellitus.

<sup>a</sup> Sex = female was used as the referent level.

<sup>b</sup> Race = Asian was used as the referent level.

**Supplementary Table 4. Results of the Ad-hoc Time-to-Event Analyses**

| <b>Duration of look-back period</b> | <b>Minimum age (in years) at the start of follow-up period</b> | <b>Sample size</b> | <b>Coefficient of main effect term</b> | <b>sHR of main effect term [95% CI]</b> | <b>Coefficient of time-vaccination interaction term</b> |
|-------------------------------------|----------------------------------------------------------------|--------------------|----------------------------------------|-----------------------------------------|---------------------------------------------------------|
| 6 years                             | ≥ 65                                                           | 1,554,094          | -0.27                                  | 0.76<br>[0.74, 0.78]                    | 0.0059                                                  |
| 6 years                             | ≥ 75                                                           | 641,168            | -0.26                                  | 0.77<br>[0.76, 0.78]                    | 0.0059                                                  |
| 2 years                             | ≥ 65                                                           | 408,151            | -0.60                                  | 0.55<br>[0.48, 0.63]                    | 0.0063                                                  |
| 2 years                             | ≥ 75                                                           | 242,691            | -0.62                                  | 0.54<br>[0.47, 0.63]                    | 0.0065                                                  |

The top set of parameters (i.e., 6-year look-back period and minimum age of 65 at the start of follow-up) represents the main study design; the bottom three rows display the results of the ad-hoc time-to-event analyses involving a 2-year look-back period and/or age ≥75 at the start of follow-up. In the designs with a 2-year look-back period, the follow-up duration was 8 years. “Main effect” refers to the time-independent flu vaccination term. Because influenza vaccination violated the proportional hazards assumption (see “Secondary Analysis: Time-to-Event Model” Methods subsection), a covariate-time interaction term (i.e., flu vaccination × time) was included in the time-to-event models. Although influenza vaccination is associated with a decreased incidence of AD (as demonstrated by sHR<1.0), the positive covariate-time interaction term indicates that the effect of influenza vaccination on AD incidence diminished with time during the follow-up period. CI, confidence interval; sHR, subdistribution hazard ratio.
